# Supplementary material for: Functional and structural characterization of legume protein derivatives for advanced plant-based food applications
Source: Royal Society of Chemistry journal article supplement (doi:10.1039/d5fb00307e), 2025-12-15
Supplement: d5fb00307e1.pdf [file d5fb00307e1.pdf]

## **Supplementary Information**

### **Functional and structural characterization of legume protein derivatives for advanced plant-based food applications**

**Harsha Varayil<sup>a</sup>, Jayeeta Mitra<sup>a\*</sup>**

<sup>a</sup> Agricultural and Food Engineering Department, Indian Institute of Technology  
Kharagpur, Kharagpur, 721302, West Bengal, India,

\*Corresponding Author: Agricultural and Food Engineering Department, Indian  
Institute of Technology Kharagpur, Kharagpur - 721302, West Bengal, India.

\*Corresponding Author Email: [jayeeta.mitra@agfe.iitkgp.ac.in](mailto:jayeeta.mitra@agfe.iitkgp.ac.in)

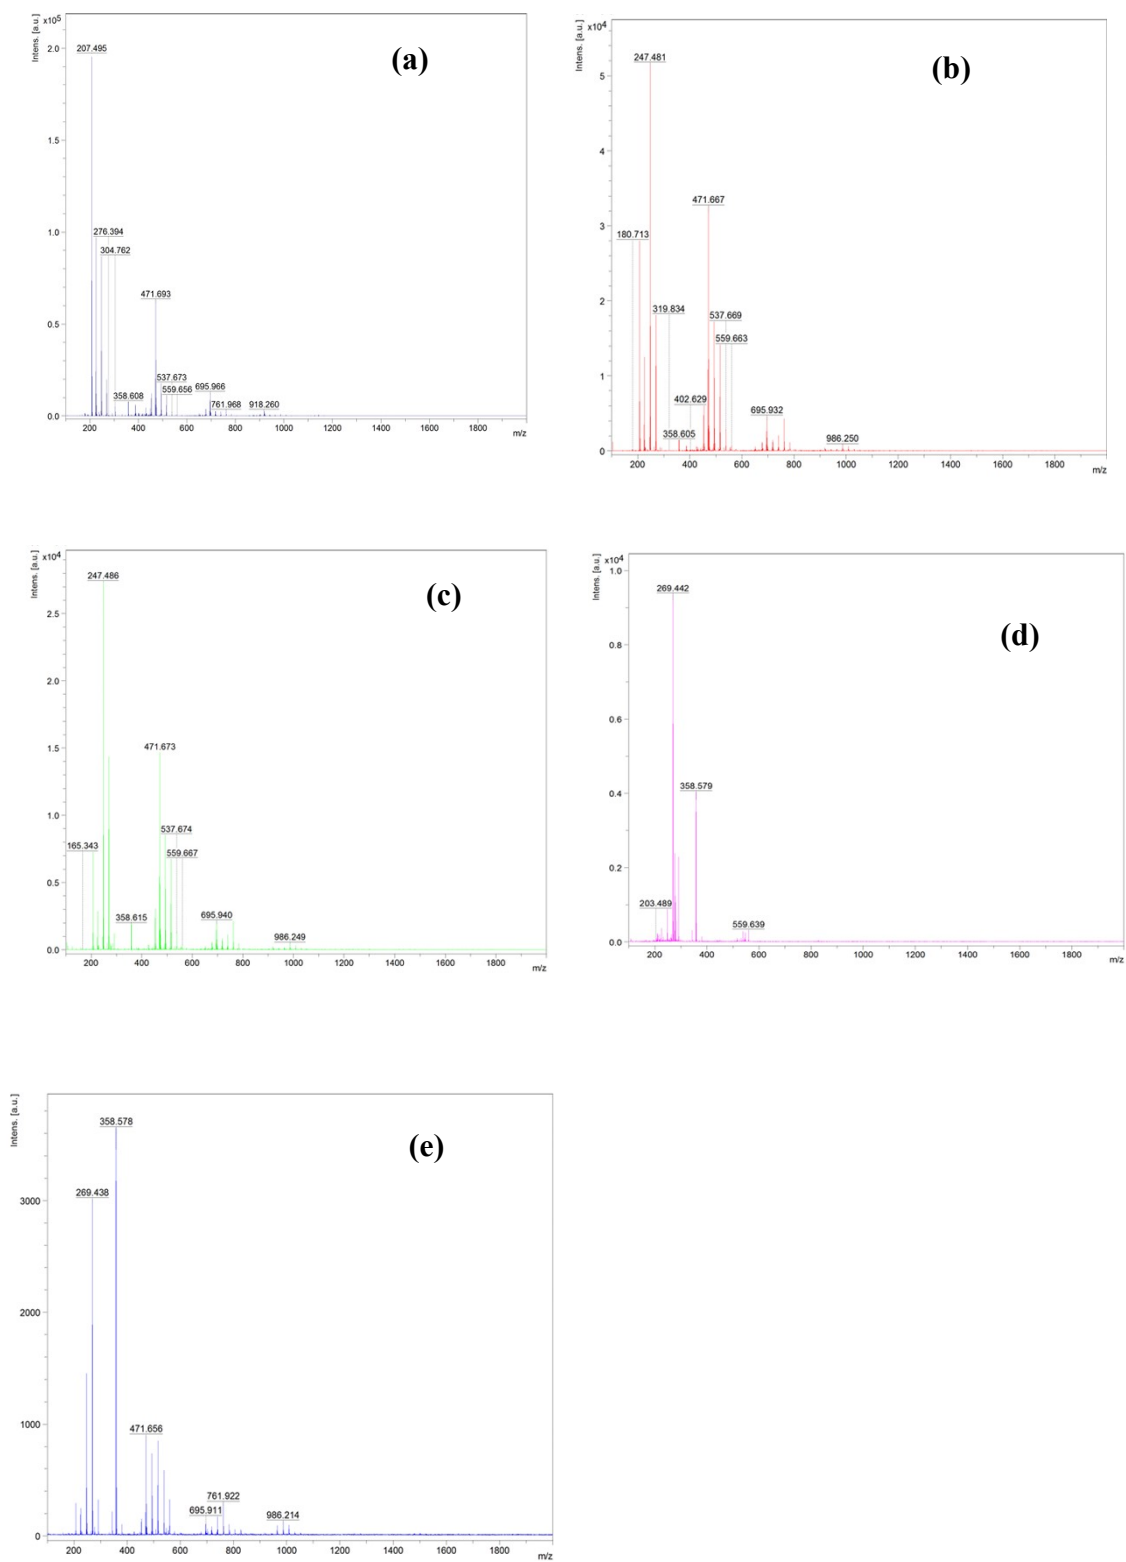

**Fig. SI 1** MALDI- TOF Mass Spectroscopy analysis of legume proteins. a) PP; b) MP; c) CP; d) LP; e) FBP
